# Supplementary material for: Development of a Novel Adult Congenital Heart Disease–Specific Patient‐Reported Outcome Metric
Source: PubMed Central journal article supplement — J Am Heart Assoc. 2020 Jun 12;9(11):e015730. doi: 10.1161/JAHA.119.015730 (PMC7428986; doi:10.1161/jaha.119.015730), 2020-06-12
Supplement: JAH3-9-e015730-s001.pdf [file JAH3-9-e015730-s001.pdf]

# **SUPPLEMENTAL MATERIAL**

**Table S1. Domains and corresponding item numbers.**

| <b>Domain</b>        | <b>Item numbers</b>                                |
|----------------------|----------------------------------------------------|
| Physical Limitations | 4, 5, 31, 32, 33                                   |
| Symptoms             | 1, 2, 6, 8, 9                                      |
| Arrhythmia           | 3, 7, 10                                           |
| Quality of Life      | 11, 12, 26, 27, 28, 29, 30                         |
| Anxiety/Depression   | 13, 14, 15, 16, 17, 18, 19, 20, 21, 22, 23, 24, 25 |

**Table S2. Other significant medical diagnoses.**

| Diabetes | Hypertension | Chronic obstructive pulmonary disease/Asthma | Coronary artery disease | Arrhythmia |
|----------|--------------|----------------------------------------------|-------------------------|------------|
| 9 (8.7%) | 16 (15.5%)   | 11 (10.7%)                                   | 0 (0%)                  | 1 (1%)     |

**Figure S1.** The following questions refer to **congenital heart disease** and how it may affect your life. Please read and complete the following questions. There are no right or wrong answers. Please mark the answer that best applies to you.

1. **Congenital heart disease** affects people in a variety of ways. Please indicate how often you have experienced the following symptoms over the past two weeks.

| <b>Symptom</b>                                        | All of the time | Several times per day | At least once a day | 3 or more times per week but not every day | 1-2 times per week | Less than once a week | Never over the past two weeks |
|-------------------------------------------------------|-----------------|-----------------------|---------------------|--------------------------------------------|--------------------|-----------------------|-------------------------------|
| Felt dizzy                                            | 0               | 0                     | 0                   | 0                                          | 0                  | 0                     | 0                             |
| Had a headache                                        | 0               | 0                     | 0                   | 0                                          | 0                  | 0                     | 0                             |
| Felt like you were about to faint or fainted          | 0               | 0                     | 0                   | 0                                          | 0                  | 0                     | 0                             |
| Felt that you could not catch your breath             | 0               | 0                     | 0                   | 0                                          | 0                  | 0                     | 0                             |
| Felt your energy level was low                        | 0               | 0                     | 0                   | 0                                          | 0                  | 0                     | 0                             |
| Felt as if you could fall asleep anywhere at any time | 0               | 0                     | 0                   | 0                                          | 0                  | 0                     | 0                             |
| Felt that your heart was racing                       | 0               | 0                     | 0                   | 0                                          | 0                  | 0                     | 0                             |

2. Over the past two weeks how much has **swelling** in your legs, abdomen, or hands bothered you?

|           |             |            |          |            |                      |
|-----------|-------------|------------|----------|------------|----------------------|
| Extremely | Quite a lot | Moderately | Slightly | Not at all | I've had no swelling |
| 0         | 0           | 0          | 0        | 0          | 0                    |

3. Compared with two weeks ago, have symptoms related to your **congenital heart disease** changed? My symptoms have become...

|            |                |             |                 |             |                                              |
|------------|----------------|-------------|-----------------|-------------|----------------------------------------------|
| Much worse | Slightly worse | Not changed | Slightly better | Much better | I've had no symptoms over the last two weeks |
| 0          | 0              | 0           | 0               | 0           | 0                                            |

4. Compared with two weeks ago, has there been a change in the amount of time that you have felt your heart was **in an abnormal rhythm**? My heart has been in an **abnormal rhythm**...

|                 |                     |                             |            |                 |                               |
|-----------------|---------------------|-----------------------------|------------|-----------------|-------------------------------|
| Much more often | Slightly more often | The same amount of the time | Less often | Much less often | Never over the last two weeks |
| 0               | 0                   | 0                           | 0          | 0               | 0                             |

5. Over the past two weeks how often have you held back from doing something because you were afraid that something bad might happen as a result of your **congenital heart disease**?

|                 |                       |                     |                                            |                    |                       |                               |
|-----------------|-----------------------|---------------------|--------------------------------------------|--------------------|-----------------------|-------------------------------|
| All of the time | Several times per day | At least once a day | 3 or more times per week but not every day | 1-2 times per week | Less than once a week | Never over the past two weeks |
| 0               | 0                     | 0                   | 0                                          | 0                  | 0                     | 0                             |

6. Over the past two weeks have you felt that your quality of life has gotten worse because of your **congenital heart disease**?

|                                     |                                         |                                     |                               |                              |
|-------------------------------------|-----------------------------------------|-------------------------------------|-------------------------------|------------------------------|
| I felt that way <b>all the time</b> | I felt that way <b>most of the time</b> | I <b>occasionally</b> felt that way | I <b>rarely</b> felt that way | I <b>never</b> felt that way |
| 0                                   | 0                                       | 0                                   | 0                             | 0                            |

7. Over the past two weeks have you felt that your **congenital heart disease** defined who you are?

|                                     |                                         |                                     |                               |                              |
|-------------------------------------|-----------------------------------------|-------------------------------------|-------------------------------|------------------------------|
| I felt that way <b>all the time</b> | I felt that way <b>most of the time</b> | I <b>occasionally</b> felt that way | I <b>rarely</b> felt that way | I <b>never</b> felt that way |
| 0                                   | 0                                       | 0                                   | 0                             | 0                            |

8. Over the past two weeks have you felt that your **congenital heart disease** made you different from everyone else?

|                                     |                                         |                                     |                               |                              |
|-------------------------------------|-----------------------------------------|-------------------------------------|-------------------------------|------------------------------|
| I felt that way <b>all the time</b> | I felt that way <b>most of the time</b> | I <b>occasionally</b> felt that way | I <b>rarely</b> felt that way | I <b>never</b> felt that way |
| 0                                   | 0                                       | 0                                   | 0                             | 0                            |

9. Over the past two weeks have you felt that people have treated you differently as a result of your **congenital heart disease**?

|                                        |                                            |                                        |                                  |                                 |
|----------------------------------------|--------------------------------------------|----------------------------------------|----------------------------------|---------------------------------|
| I felt that way<br><b>all the time</b> | I felt that way<br><b>most of the time</b> | I <b>occasionally</b><br>felt that way | I <b>rarely</b> felt<br>that way | I <b>never</b> felt<br>that way |
| 0                                      | 0                                          | 0                                      | 0                                | 0                               |

10. How does living with **congenital heart disease** can affect you psychologically? Over the past two weeks I have felt...

|                                                                                         | All the time | Most of the time | Occasionally | Rarely | Never |
|-----------------------------------------------------------------------------------------|--------------|------------------|--------------|--------|-------|
| Depressed                                                                               | 0            | 0                | 0            | 0      | 0     |
| Isolated                                                                                | 0            | 0                | 0            | 0      | 0     |
| A lack of interest in life                                                              | 0            | 0                | 0            | 0      | 0     |
| Like something bad might happen to me as a result of my <b>congenital heart disease</b> | 0            | 0                | 0            | 0      | 0     |
| Anxiety about needing surgery                                                           | 0            | 0                | 0            | 0      | 0     |
| As if nothing is going to work to help my <b>congenital heart disease</b>               | 0            | 0                | 0            | 0      | 0     |
| As if something new was going wrong with my heart                                       | 0            | 0                | 0            | 0      | 0     |

11. Patients with **congenital heart disease** frequently experience difficulties with sleeping. Over the past two weeks when I was trying to fall asleep, I...

|                                      | All of the time | Several times per day | At least once a day | 3 or more times per week but not every day | 1-2 times per week | Less than once a week | Never over the past two weeks |
|--------------------------------------|-----------------|-----------------------|---------------------|--------------------------------------------|--------------------|-----------------------|-------------------------------|
| Felt like my thoughts were racing    | 0               | 0                     | 0                   | 0                                          | 0                  | 0                     | 0                             |
| Felt afraid that I might not wake up | 0               | 0                     | 0                   | 0                                          | 0                  | 0                     | 0                             |

when I fall  
asleep

---

Wondered  
what my  
heart was  
doing

---

0 0 0 0 0 0 0

12. How much does your **congenital heart disease** affect your life? Over the past two weeks, my heart disease...

Definitely                      Somewhat                      Slightly                      Not at all                      Does not apply

---

Made it difficult for  
me to concentrate on  
other parts of my life

0 0 0 0 0

---

Made me feel that I  
had to arrange my  
life around my heart  
disease

0 0 0 0 0

---

Directed my plans for  
the future

0 0 0 0 0

---

Made me experience  
guilt that I am a  
burden on my family

0 0 0 0 0

---

Made me concerned  
that I might not have  
a successful career  
because of my health

0 0 0 0 0

---

Made me feel short  
of breath when  
walking up a flight of  
stairs

0 0 0 0 0

---

Made me feel like  
everything was an  
absolute struggle

0 0 0 0 0

---

Made me not want to  
do even routine  
things (like getting  
dressed, showering,  
or making breakfast)

---

0 0 0 0 0

**Figure S2.**

|                                                                                                                                                                                                                                                                                                                                                                                                                                                                                                                                                                                                                                                                                                                                  |                                                                                                                                                                                                                                                                                                                                                                                                                                                                                                                                                                                                                                                                                                                                       |
|----------------------------------------------------------------------------------------------------------------------------------------------------------------------------------------------------------------------------------------------------------------------------------------------------------------------------------------------------------------------------------------------------------------------------------------------------------------------------------------------------------------------------------------------------------------------------------------------------------------------------------------------------------------------------------------------------------------------------------|---------------------------------------------------------------------------------------------------------------------------------------------------------------------------------------------------------------------------------------------------------------------------------------------------------------------------------------------------------------------------------------------------------------------------------------------------------------------------------------------------------------------------------------------------------------------------------------------------------------------------------------------------------------------------------------------------------------------------------------|
| <b>Since your previous visit with your cardiologist has there been an overall change in your heart disease that affects the way you feel? Would you say that you are worse, about the same, or better? (Circle the numbers that apply)</b>                                                                                                                                                                                                                                                                                                                                                                                                                                                                                       |                                                                                                                                                                                                                                                                                                                                                                                                                                                                                                                                                                                                                                                                                                                                       |
| 1) Worse (Go to series A)<br>2) About the same (Done)<br>3) Better (Go to series B)                                                                                                                                                                                                                                                                                                                                                                                                                                                                                                                                                                                                                                              |                                                                                                                                                                                                                                                                                                                                                                                                                                                                                                                                                                                                                                                                                                                                       |
| <p style="text-align: center;"><b><u>Series A</u></b></p> <p>How much more limited would you say you have been due to heart disease since the last time the doctor saw you?</p> <ol style="list-style-type: none"><li>1) Almost the same, hardly limited, not important</li><li>2) A little more limited, but large enough to be important</li><li>3) Somewhat more limited but large enough to be important</li><li>4) Moderately more limited, an important change for the worse</li><li>5) A good deal more limited, an important change for the worse</li><li>6) A great deal more limited, a very important change for the worse</li><li>7) A very great deal more limited, a very important change for the worse</li></ol> | <p style="text-align: center;"><b><u>Series B</u></b></p> <p>How much better would you say you have been due to heart disease since the last time the doctor saw you?</p> <ol style="list-style-type: none"><li>1) Almost the same, slightly less limited, not important</li><li>2) A little less limited, but large enough to be important</li><li>3) Somewhat less limited but large enough to be important</li><li>4) Moderately less limited, an important change for the better</li><li>5) A good deal less limited, an important change for the better</li><li>6) A great deal less limited, a very important change for the better</li><li>7) A very great deal less limited, a very important change for the better</li></ol> |
